# Supplementary material for: Surface modification of semiconductor nanocrystals by a methanofullerene carboxylic acid
Source: Royal Society of Chemistry journal article supplement (doi:10.1039/c0jm02347g), 2010-01-01
Supplement: c0jm02347g.pdf [file c0jm02347g.pdf]

Supporting information

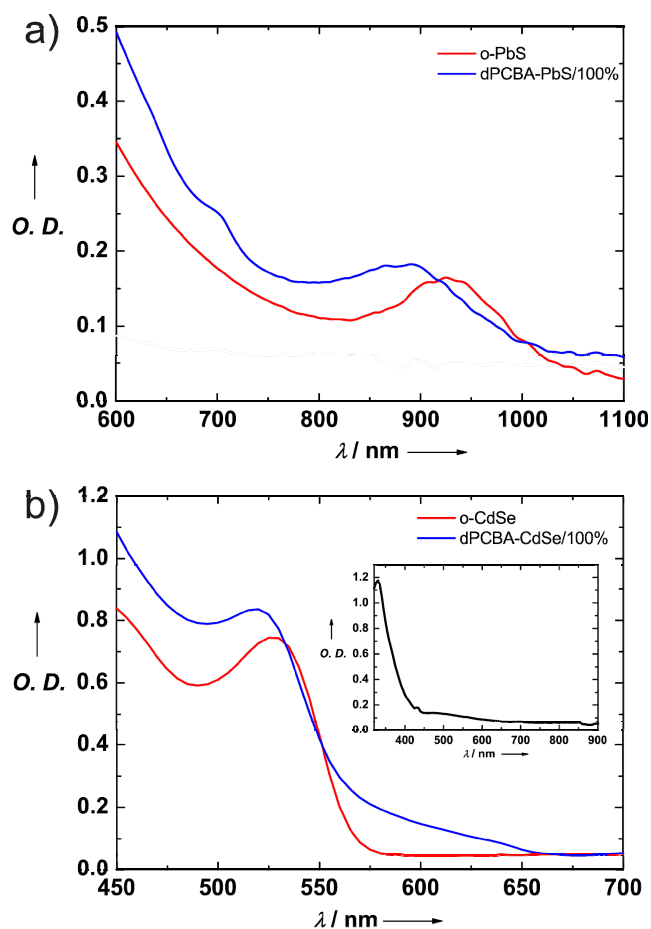

Figure S1. Room-temperature OD of a) dPCBA-PbS NCs and b) d-PCBA-CdSe NCs compared to the OD of dPCBA and o-PbS NCs or o-CdSe NCs, respectively.

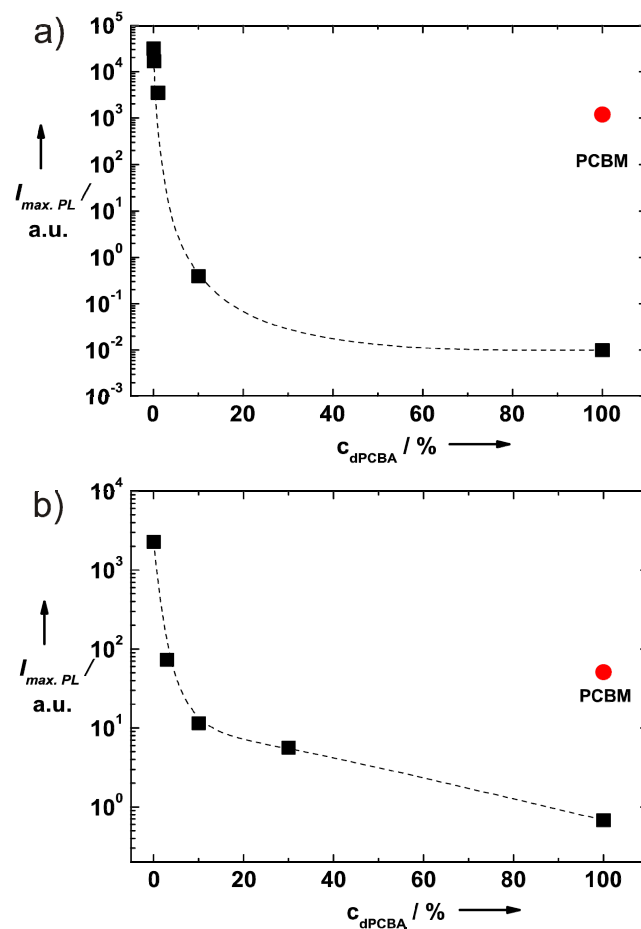

Figure S2. Steady-state PL maxima of a) oleate and dPCBA capped PbS NCs and the PbS:PCBM and b) oleylamine and dPCBA capped CdSe NCs and the CdSe:PCBM reference blend in solutions, respectively.

10

15

20

25
